# Supplementary material
Source: ML conference proceedings conference paper supplement (https://openreview.net/forum?id=WKALcMvCdm)

• Objective value (out of feasible region)    • Objective value (inside feasible region)    ★ Optimum

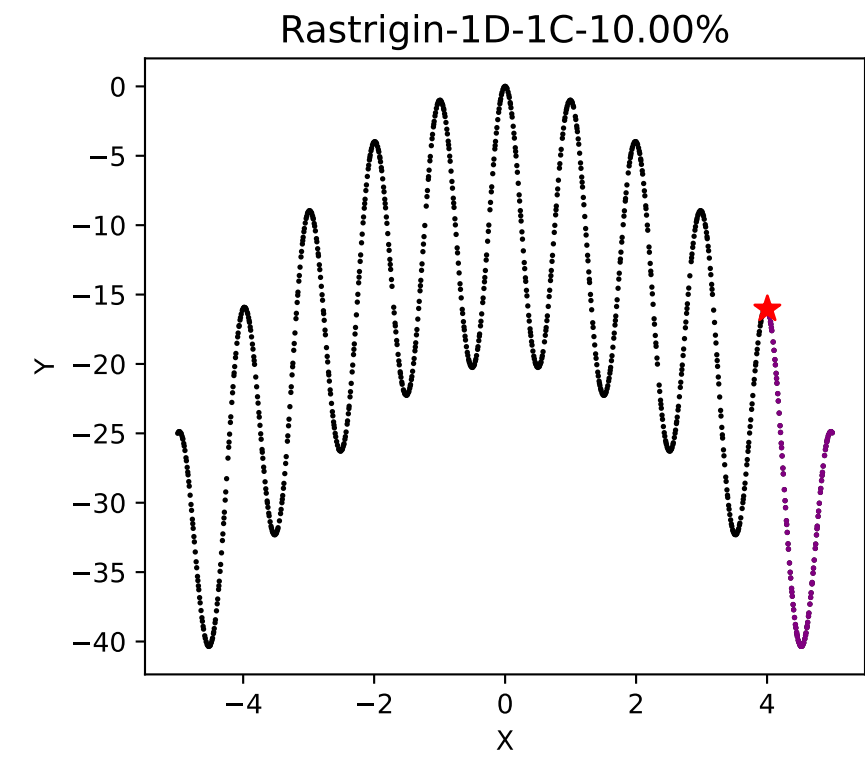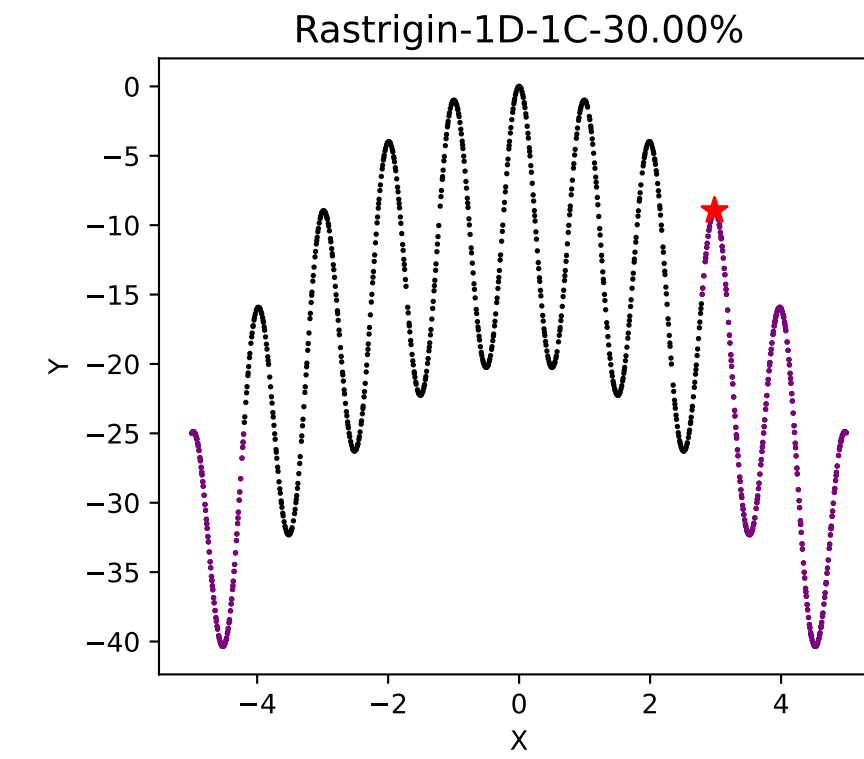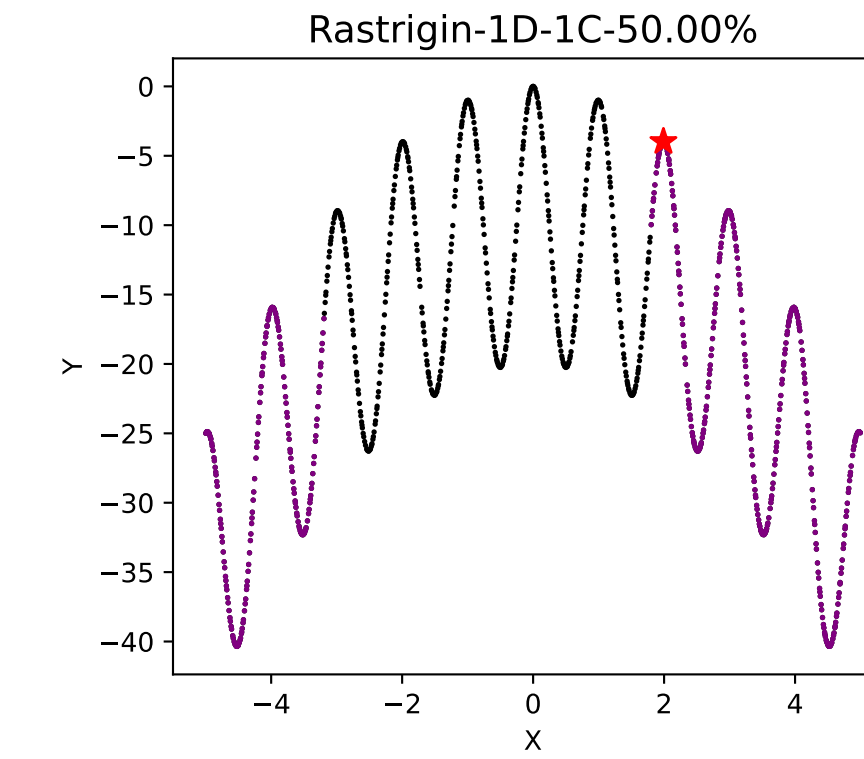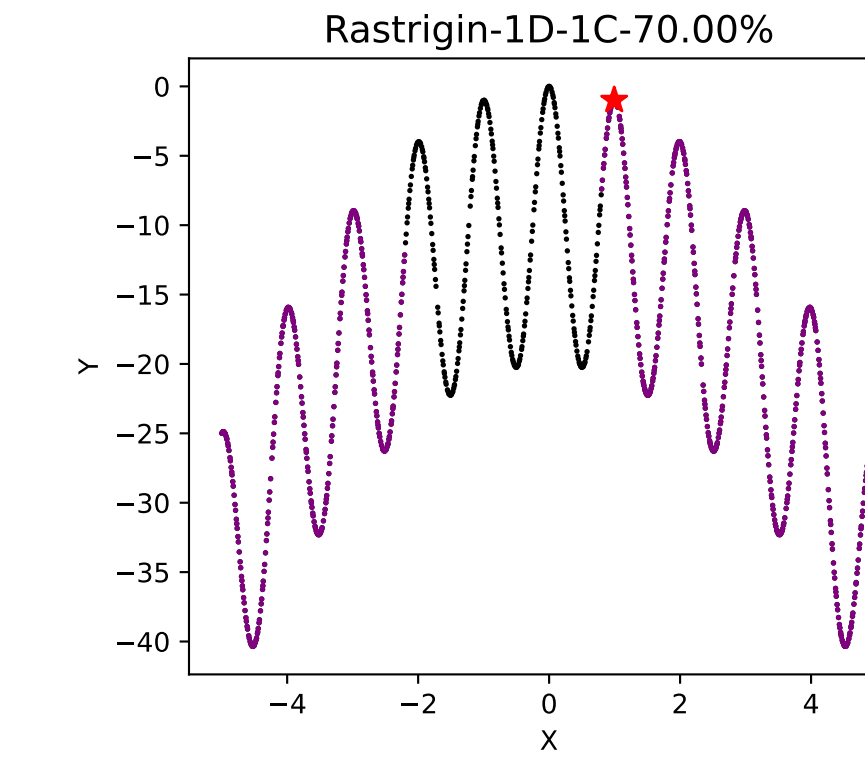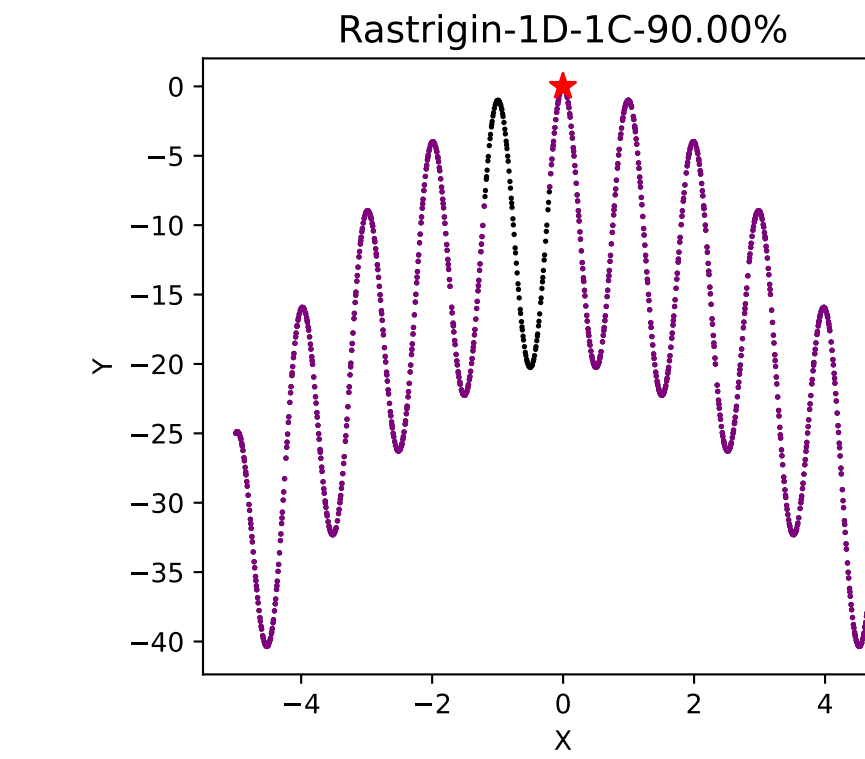

— CBO    — CMES-IBO    — cEI    — SCBO

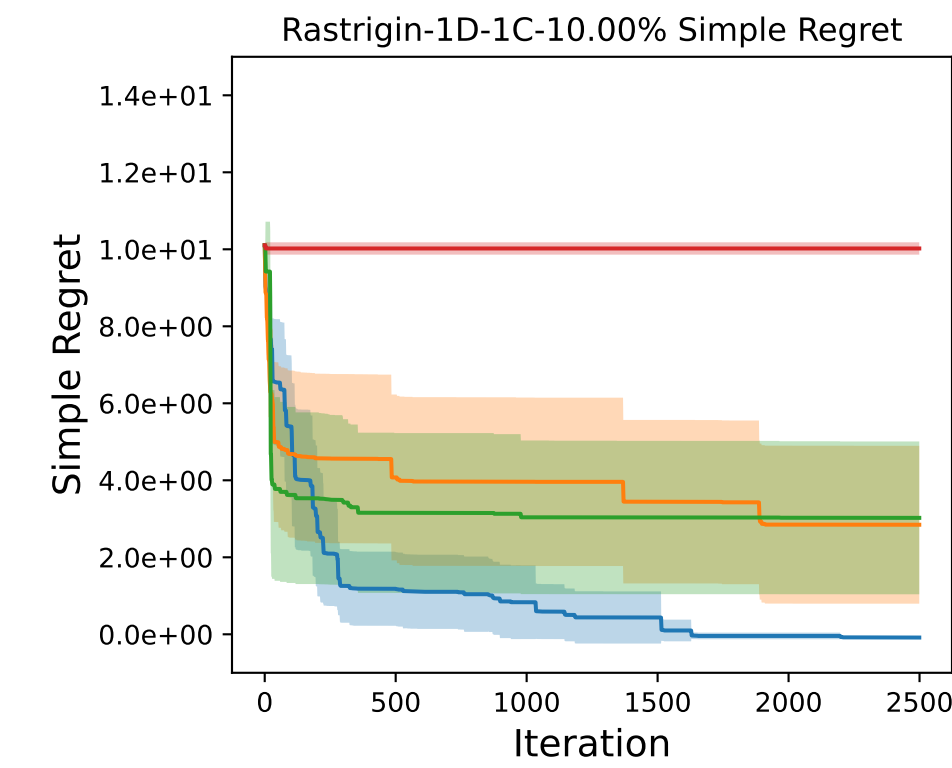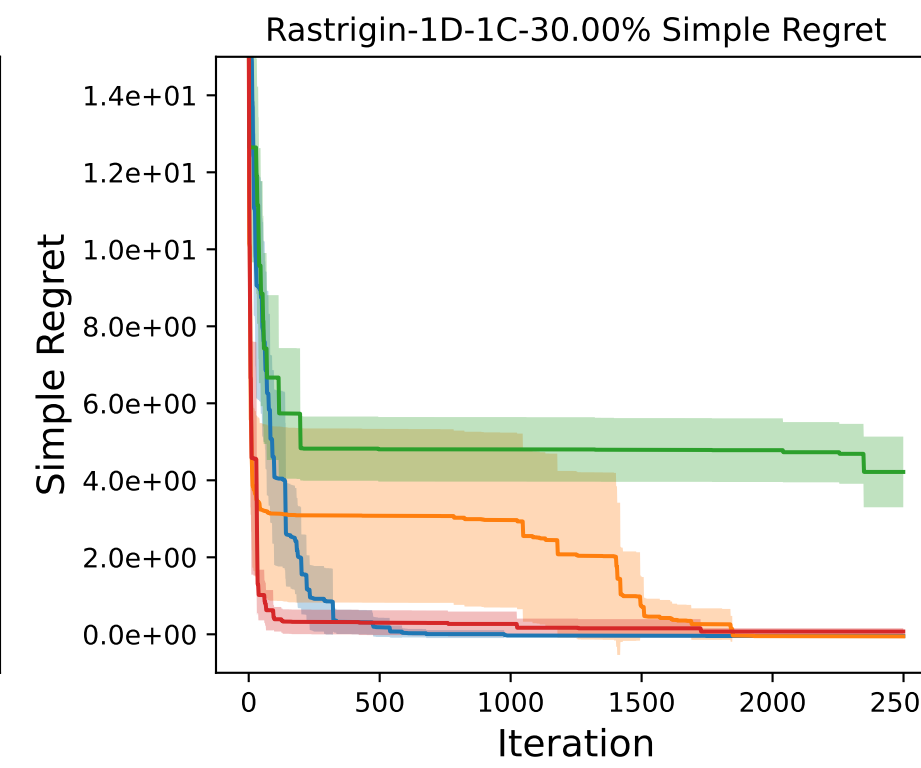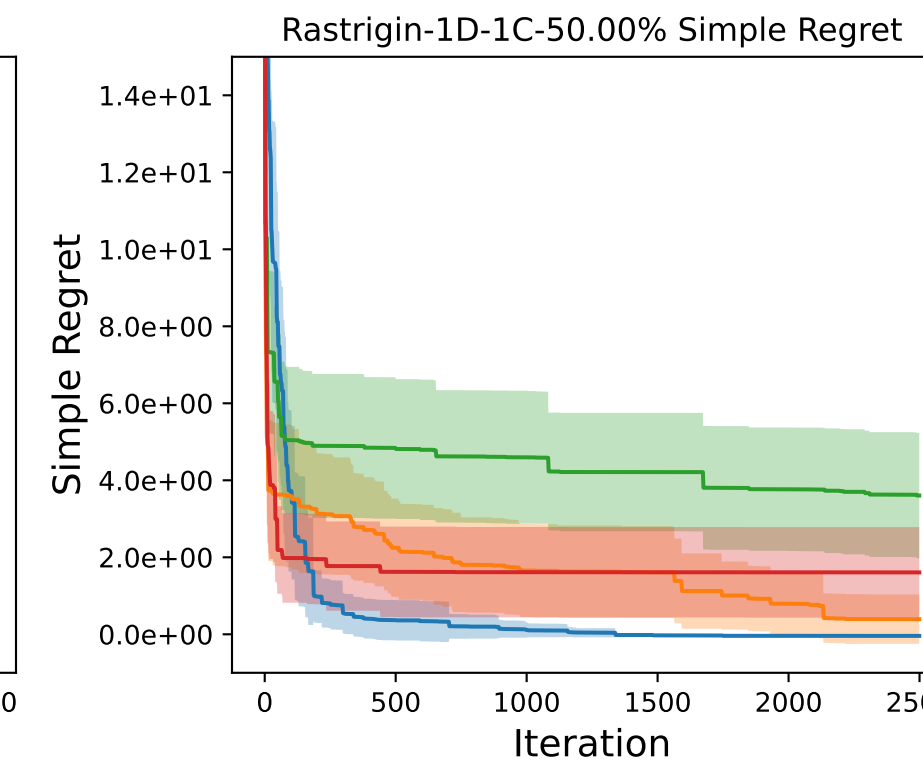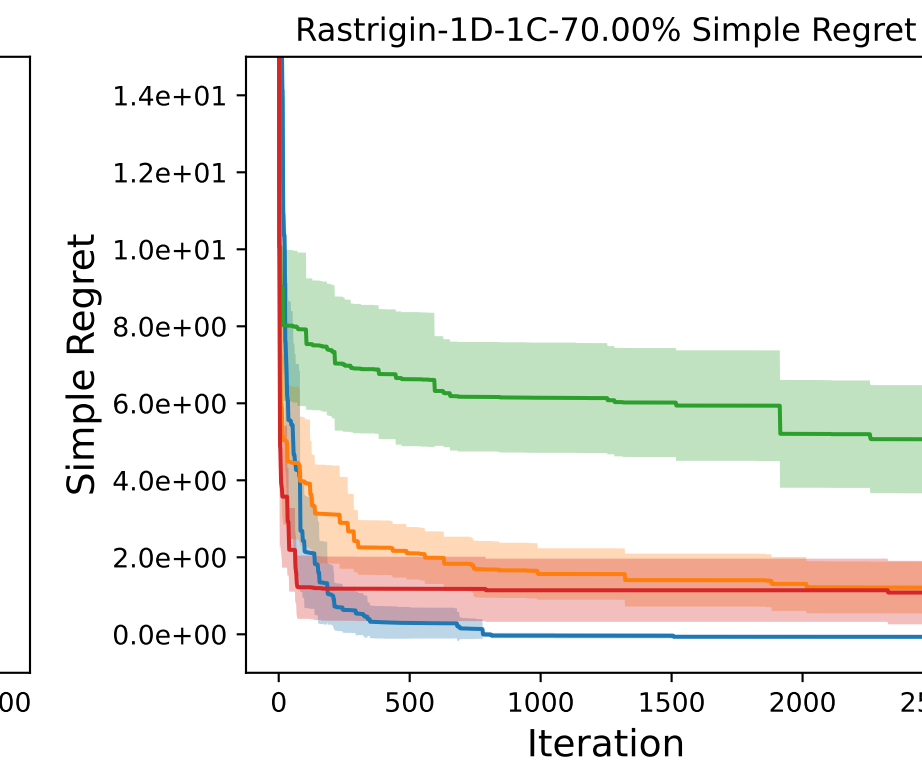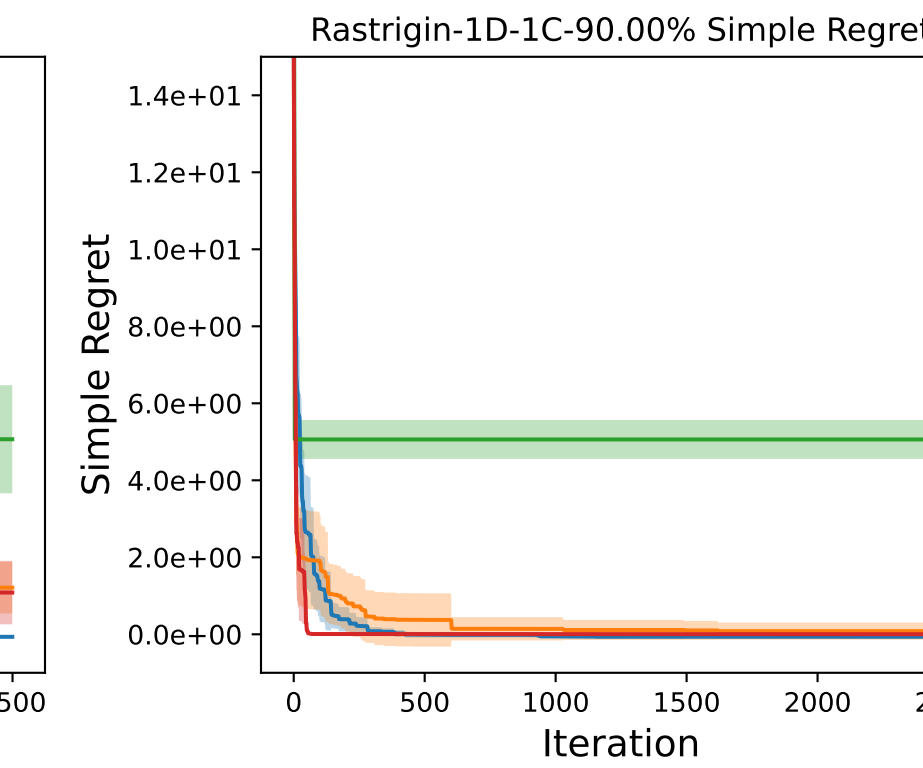

Supplement: supplementary_material [file attachment]
